# Supplementary material for: iPSC-Derived Cardiomyocytes in Inherited Cardiac Arrhythmias: Pathomechanistic Discovery and Drug Development
Source: MDPI journal article supplement (doi:10.3390/biomedicines11020334), 2023-01-25
Supplement: s1 [file s1]

**Supplementary Table S1:** overview of previously published 2D iPSC-CM cardiac arrhythmia disease models

| Syndrome | Causal gene                                    | Experimental approach | Cellular phenotype                                                                                                                                                      | Ref   |
|----------|------------------------------------------------|-----------------------|-------------------------------------------------------------------------------------------------------------------------------------------------------------------------|-------|
| LQTS     | <i>KCNQ1</i><br>(c.1893del)                    | PC, MEA               | Reduced $I_{Kr}$ , prolonged APD, reduced wild-type <i>KCNQ1</i> mRNA and protein                                                                                       | [102] |
|          | <i>KCNQ1</i><br>exon 7 deletion                | PC                    | Reduced $I_{Ks}$ , APD prolongation, reduced wild type <i>KCNQ1</i> mRNA and protein, small molecule ML277 partially restored APD and reversed the decreased $I_{Ks}$ . | [103] |
|          | <i>KCNQ1</i><br>p.(Arg594Gln)<br>p.(Arg190Gln) | PC, MEA               | Prolonged APD, reduced $I_{Ks}$ activation that was reversed by hERG allosteric modulator LUF7346                                                                       | [104] |
|          | <i>KCNH2</i><br>p.(Ala614Val)                  | PC                    | Prolonged APD, reduction of $I_{Kr}$ , EADs, arrhythmias and potential improvement with pinacidil                                                                       | [105] |
|          | <i>KCNH2</i><br>p.(Arg176Trp)                  | PC, MEA               | Prolonged APD, reduced $I_{Kr}$ , demonstrated arrhythmogenic electrical activity                                                                                       | [106] |
|          | <i>KCNH2</i><br>p.(Gly1681Ala)                 | PC                    | APD prolongation and EADs                                                                                                                                               | [92]  |
|          | <i>KCNH2</i><br>p.(Asn996Ile)                  | PC, MEA               | Prolonged APD, reduced $I_{Kr}$ activation that was reversed by hERG allosteric modulator LUF7346                                                                       | [104] |
|          | <i>SCN5A</i><br>p.(Phe1473Cys)                 | PC                    | Delayed repolarization, prolonged QT interval with increase in pacing improving the phenotype, increased risk of fatal arrhythmia                                       | [107] |
|          | <i>SCN5A</i><br>p.(Val1763Met)                 | PC                    | Prolonged APD, elevated late $I_{Na}$ current, Nav1.5 blocker can reverse related symptom                                                                               | [108] |
|          | <i>SCN5A</i><br>p.(Val240Met)<br>p.(Arg535Gln) | PC                    | Insignificant increase in APD, delayed time to peak $I_{Na}$ inactivation                                                                                               | [109] |
|          | <i>SCN5A</i><br>p.(Arg1644His)                 | PC, MEA               | Prolonged APD, high EADs, and accelerated recovery from inactivation of $Na^+$ currents. Rescue of abnormal phenotype by mexiletine and ranolazine                      | [103] |

| Syndrome | Causal gene                                                    | Experimental approach | Cellular phenotype                                                                                                                                                                                             | Ref   |
|----------|----------------------------------------------------------------|-----------------------|----------------------------------------------------------------------------------------------------------------------------------------------------------------------------------------------------------------|-------|
|          | <i>KCNJ2</i><br>p.(Arg218Trp)<br>p.(Arg67Trp)<br>p.(Arg218Gln) | MEA, CI               | Strong arrhythmic events, higher incidence of irregular Ca <sup>2+</sup> release. Flecainide, but not pilsicainide, suppressed irregular Ca <sup>2+</sup> release and arrhythmic events                        | [111] |
|          | <i>CACNA1C</i><br>p.(Gly1216Ala)                               | PC, CI                | APD prolongation and DADs, abnormal calcium handling, irregular and slow contraction. Roscovitine rescued abnormal cellular phenotype                                                                          | [112] |
|          | <i>CALM1</i><br>p.(Phe142Leu)                                  | PC, MEA, CI           | Prolonged APD, defective I <sub>Ca-L</sub> inactivation, altered rate-dependency and response to isoproterenol. Repolarization abnormalities reversed by verapamil                                             | [113] |
|          | <i>CALM2</i><br>p.(Asn98Ser)                                   | PC                    | Lower beating rate, prolonged APD, and impaired I <sub>Ca-L</sub> inactivation, correction of the mutant allele rescued abnormal phenotype                                                                     | [114] |
|          | <i>CALM2</i><br>p.(Asp130Gly)                                  | PC, IF                | Prolonged APD, disrupted Ca <sup>2+</sup> cycling properties, and diminished Ca <sup>2+</sup> /CaM-dependent inactivation of I <sub>Ca-L</sub> . Suppressing the mutant gene rescued abnormal phenotype        | [115] |
|          | <i>PKP2</i><br>(c.2484C>T)                                     | PA, MEA, CI           | Reduced I <sub>Na</sub> , deficit restored by transfection of WT gene                                                                                                                                          | [116] |
|          | <i>PKP2</i><br>p.(Arg101His)                                   | PC                    | Reduced APD90                                                                                                                                                                                                  | [84]  |
| BrS      | <i>RRAD</i><br>p.(Arg211His)                                   | PC, CI                | Reduced V <sub>max</sub> of AP, prolonged APs and increased incidence of EADs, decreased I <sub>Na</sub> peak amplitude, increased I <sub>Na</sub> persistent amplitude, decreased I <sub>Ca-L</sub> amplitude | [117] |
|          | <i>SCN5A</i><br>p.(Arg1638X)<br>p.(Trp156X)                    | PC                    | Reduced V <sub>max</sub> , reduced I <sub>Na</sub>                                                                                                                                                             | [118] |
|          | <i>SCN5A</i><br>p.(Ala226Val)+<br>p.(Arg1629X)<br><i>SCN5A</i> | PC                    | Ala226Val/Arg1629X: Reduced I <sub>Na</sub> , reduced V <sub>max</sub> and APA<br>Thr1620Met: no effect on I <sub>Na</sub> and normal AP                                                                       | [119] |

| Syndrome | Causal gene                                        | Experimental approach | Cellular phenotype                                                                                                                                                                                                                     | Ref   |
|----------|----------------------------------------------------|-----------------------|----------------------------------------------------------------------------------------------------------------------------------------------------------------------------------------------------------------------------------------|-------|
|          | p.(Thr1620Met)                                     |                       |                                                                                                                                                                                                                                        |       |
|          | <i>SCN5A</i><br>p.(Arg367His)                      | PC                    | Reduced $I_{Na}$ , shift in activation and inactivation voltage-dependence curves, faster recovery from inactivation                                                                                                                   | [120] |
|          | <i>SCN5A</i><br>p.(Ala735Val)                      | PC                    | Reduced APA and $V_{max}$ , reduced $I_{Na}$ , shift in activation and inactivation voltage-dependence curves                                                                                                                          | [121] |
|          | <i>SCN10A</i><br>p.(Arg1250Gln)+<br>p.(Arg1268Gln) | PC, CI                | Reduced peak $I_{Na}$ and $I_{NaL}$ , accelerated recovery from inactivation in patient iPSC-CMs, reduced $I_{Ca-L}$ and $I_{Ks}$ , reduced APA and $V_{max}$ , increased EAD-like events                                              | [85]  |
|          | <i>SCN1B</i><br>p.(Leu210Pro)+<br>p.(Pro213Thr)    | PC, CI                | Reduced peak $I_{Na}$ and $I_{NaL}$ , positive shift in the voltage dependence of activation and negative shift of the inactivation, reduction in $I_{Ks}$ and $I_{Kr}$ , Reduced APA and $V_{max}$ , increased arrhythmia like events | [86]  |
| CPVT     | <i>RYR2</i><br>p.(Ser406Leu)                       | PC, CI                | Elevated diastolic $Ca^{2+}$ concentrations, a reduced SR $Ca^{2+}$ content, DADs and arrhythmia, dantrolene can restore these phenotype                                                                                               | [122] |
|          | <i>RYR2</i><br>p.(Pro2328Ser)                      | PC, CI                | Increased non-alternating variability of $Ca^{2+}$ transients in response to isoproterenol and $\beta$ -agonists decreased AP upslope velocity                                                                                         | [122] |
|          | <i>RYR2</i><br>p.(Met4109Arg)                      | PC, MEA, CI           | DADs were eliminated by flecainide and thapsigargin                                                                                                                                                                                    | [123] |
|          | <i>RYR2</i><br>p.(Leu3741Pro)                      | CI, MEA               | Altered intracellular $Ca^{2+}$ homeostasis, $\beta$ -adrenergic stimulation potentiated spontaneous $Ca^{2+}$ waves and prolonged $Ca^{2+}$ sparks. Flecainide ameliorated disease phenotype                                          | [124] |
|          | <i>RYR2</i><br>p.(Ile4587Val)                      | PC, CI                | Increased diastolic $Ca^{2+}$ waves and DADs with pacing, while S107 suppressed the DADs                                                                                                                                               | [126] |

| Syndrome | Causal gene                                               | Experimental approach        | Cellular phenotype                                                                                                                                   | Ref      |
|----------|-----------------------------------------------------------|------------------------------|------------------------------------------------------------------------------------------------------------------------------------------------------|----------|
|          | <i>CASQ2</i><br>p.(Asp307His)                             | PC, CI                       | $\beta$ -adrenergic agonist caused DADs, oscillatory arrhythmic pre-potentials, and diastolic $[Ca^{2+}]_i$ rise                                     | [35,126] |
|          | <i>CASQ2</i><br>p.(Asp307His)                             | PC, CI                       | $Ca^{2+}$ transient irregularities, EADs, and reduced threshold for store overload-induced $Ca^{2+}$ release, $\beta$ -blockers prevented arrhythmia | [127]    |
| ACM      | <i>PKP2</i><br>(c.2484C>T)<br><i>PKP2</i><br>(c.2013delC) | CI, seahorse metabolic assay | Abnormal plakoglobin nuclear translocation, decreased $\beta$ -catenin activity, exaggerated lipogenesis and apoptosis calcium-handling deficits     | [128]    |

Adapted and updated from Garg et al. (2018) and Pan et al. (2021) [9,10]. PC: patch clamp; IF: immunofluorescence; MEA: Multi electrode array; WB: Western Blot; CI: Calcium imaging; AFM: atomic force microscopy; AP: action potential;  $I_{Ks}$ : slow delayed rectifier  $K^+$  current; ER: endoplasmic reticulum; APD50-90: Action potential duration at 50%–90% of repolarisation; EAD: early after depolarisation;  $I_{Kr}$ : rapid delayed rectifier  $K^+$  current;  $I_{Ca-L}$ : L-type calcium current; APA: action potential amplitude;  $V_{max}$ : maximum rate of rise of the action potential;  $I_{Na}$ : sodium current; DAD: delayed after repolarisation; FP: field potential; CV: conduction velocity;  $I_{to}$ : transient outward current; SR: sarcoplasmic reticulum; EM: electron microscope.
